# Supplementary material for: The integrated genomic and epigenomic landscape of brainstem glioma
Source: PubMed Central journal article supplement (PMC7299931; doi:10.1038/s41467-020-16682-y), 2020-06-17
Supplement: 41467_2020_16682_MOESM1_ESM.pdf [file 41467_2020_16682_MOESM1_ESM.pdf]

a

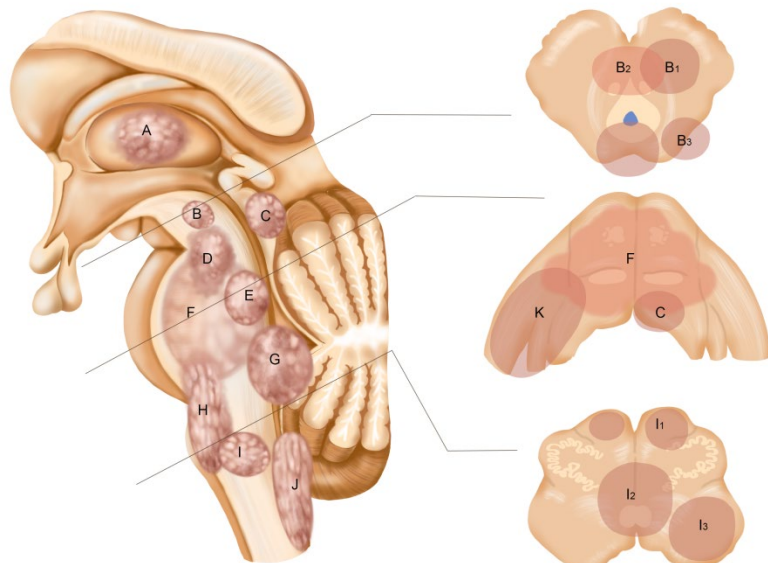

b

| Code | Type and location                 | Number of cases |
|------|-----------------------------------|-----------------|
| A    | Midbrain-thalamus                 | 5               |
| B    | Midbrain tegmentum                | 11              |
| B1   |                                   | 7               |
| B2   |                                   | 1               |
| B3   |                                   | 3               |
| C    | Tectum                            | 5               |
| D    | Pontomesencephalic junction       | 2               |
| E    | Focal pontine tumor               | 5               |
| F    | DIPG                              | 33              |
| G    | Pontomedullary junction (dorsal)  | 8               |
| H    | Pontomedullary junction (ventral) | 8               |
| I    | Focal intrinsic medullary         | 34              |
| I1   |                                   | 8               |
| I2   |                                   | 5               |
| I3   |                                   | 21              |
| J    | Dorsal exophytic medllary         | 8               |
| K    | Middle cerebellar peduncle        | 7               |

**Supplementary Figure 1 Detailed illustration of thalamus and brainstem, and summary of samples in this study** (a) Locations of tumors selected for this study. These codes are explained in panel b. (b) Counts of tumors for study in different locations.

a

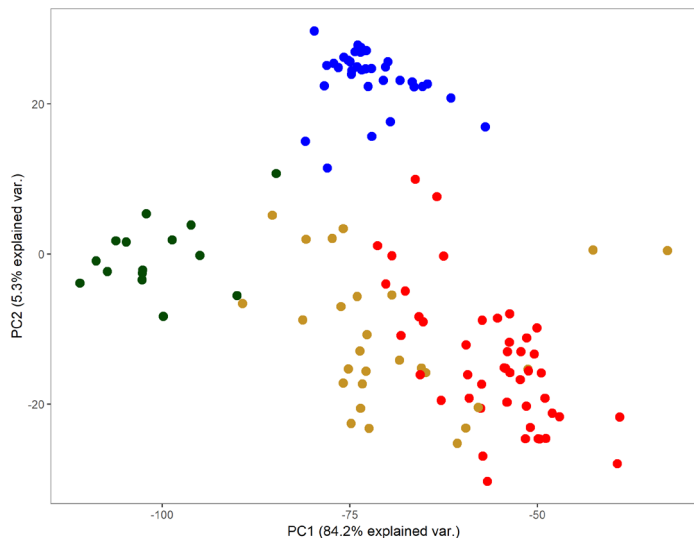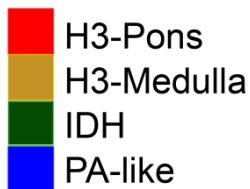

b

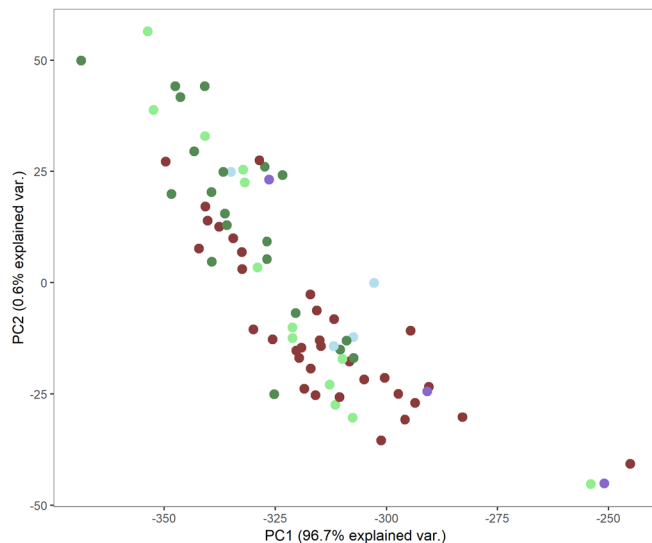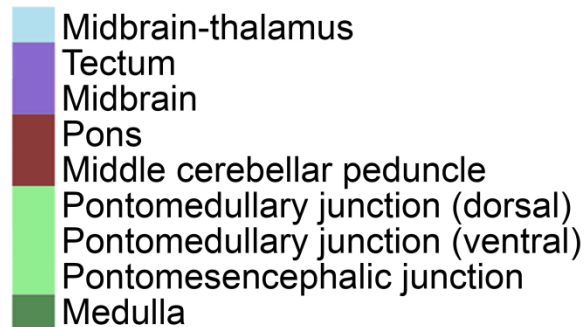

**Supplementary Figure 2 Principal component analysis for tumors** (a) PCA of selected probes for all tumors, colored by Methylation Clusters (b) PCA of whole probes for tumors from H3-Medulla and H3-Pons only, colored by tumor locations.

## Location

- Midbrain-thalamus
- Tectum
- Midbrain
- Pons
- Middle cerebellar peduncle
- Pontomedullary junction (dorsal)
- Pontomedullary junction (ventral)
- Pontomesencephalic junction
- Medulla

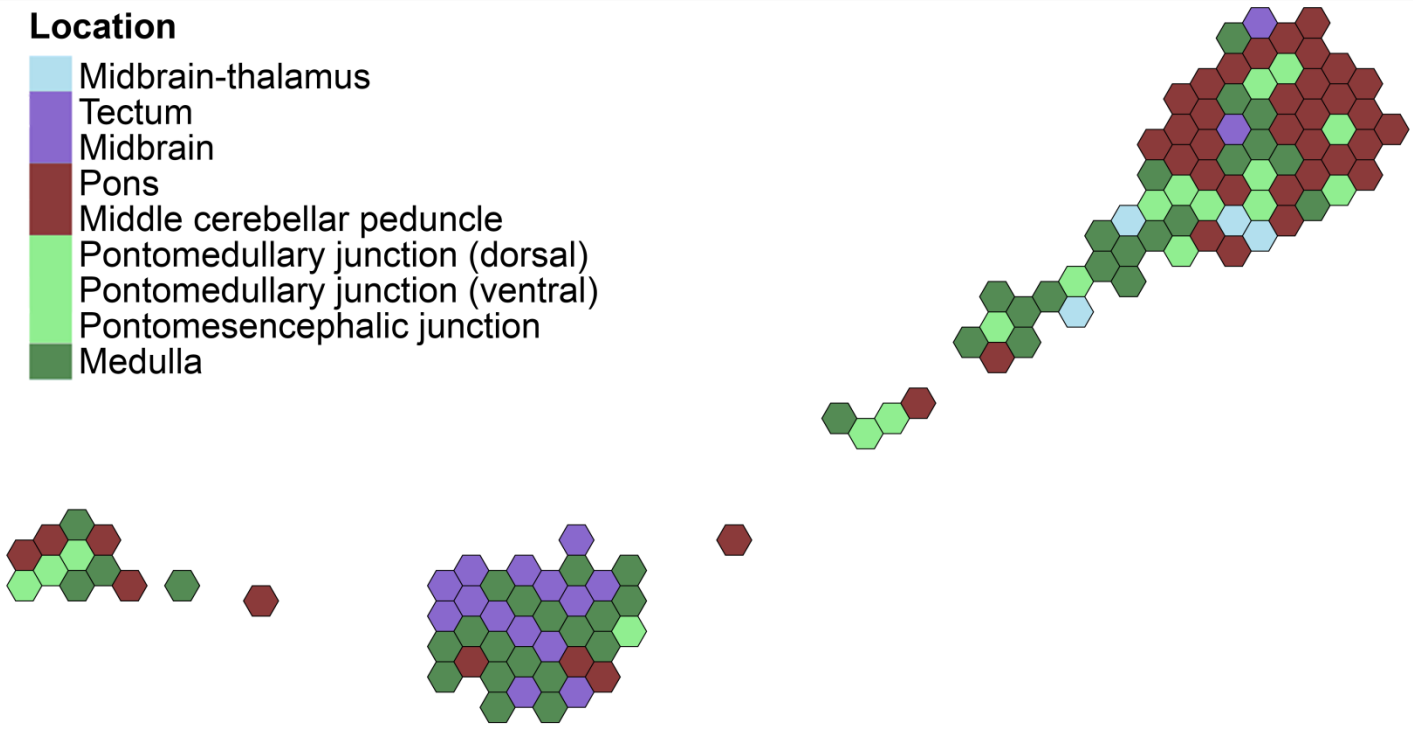

Supplementary Figure 3 Tumor map from whole probes, colored by tumor locations.

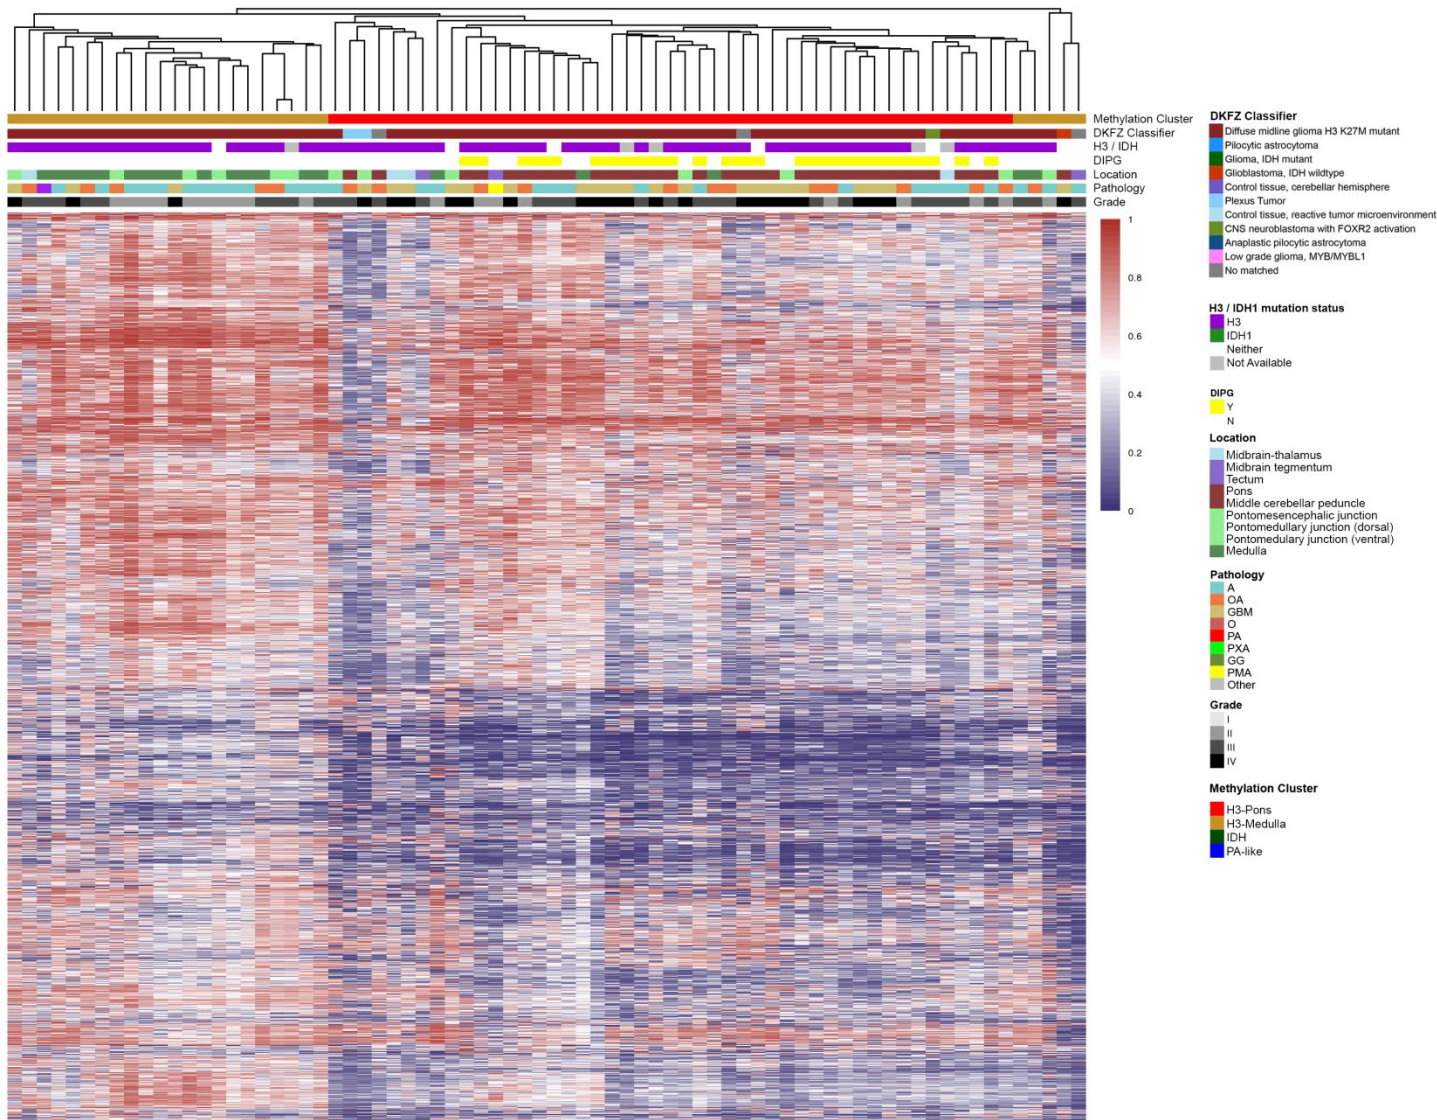

**Supplementary Figure 4 Visualization of methylation status for Samples from Methylation Clusters H3-Pons and H3-Medulla only.** Top 20000 variable probes across selected samples were utilized for hierarchical clustering of methylation status.

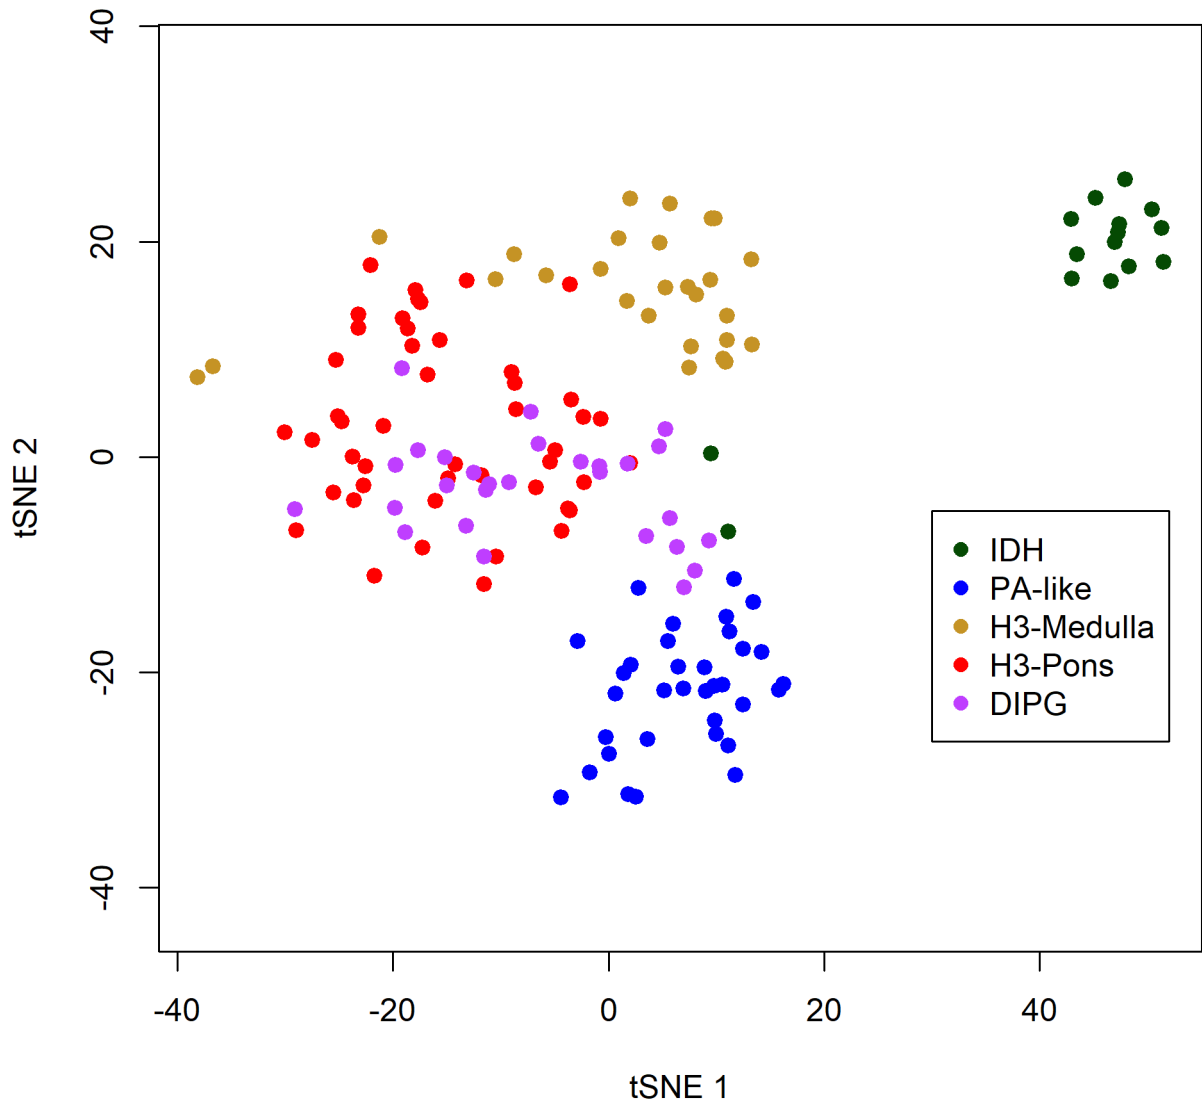

**Supplementary Figure 5 Results of tSNE for top 2000 probes selected from this study.** Both datasets of this study and Buczkowicz et al. are included. Dots marked as “IDH”, “PA-like”, “H3-Medulla”, and “H3-Pons” are from this study. Dots marked as “DIPG” are from dataset of Buczkowicz et al.

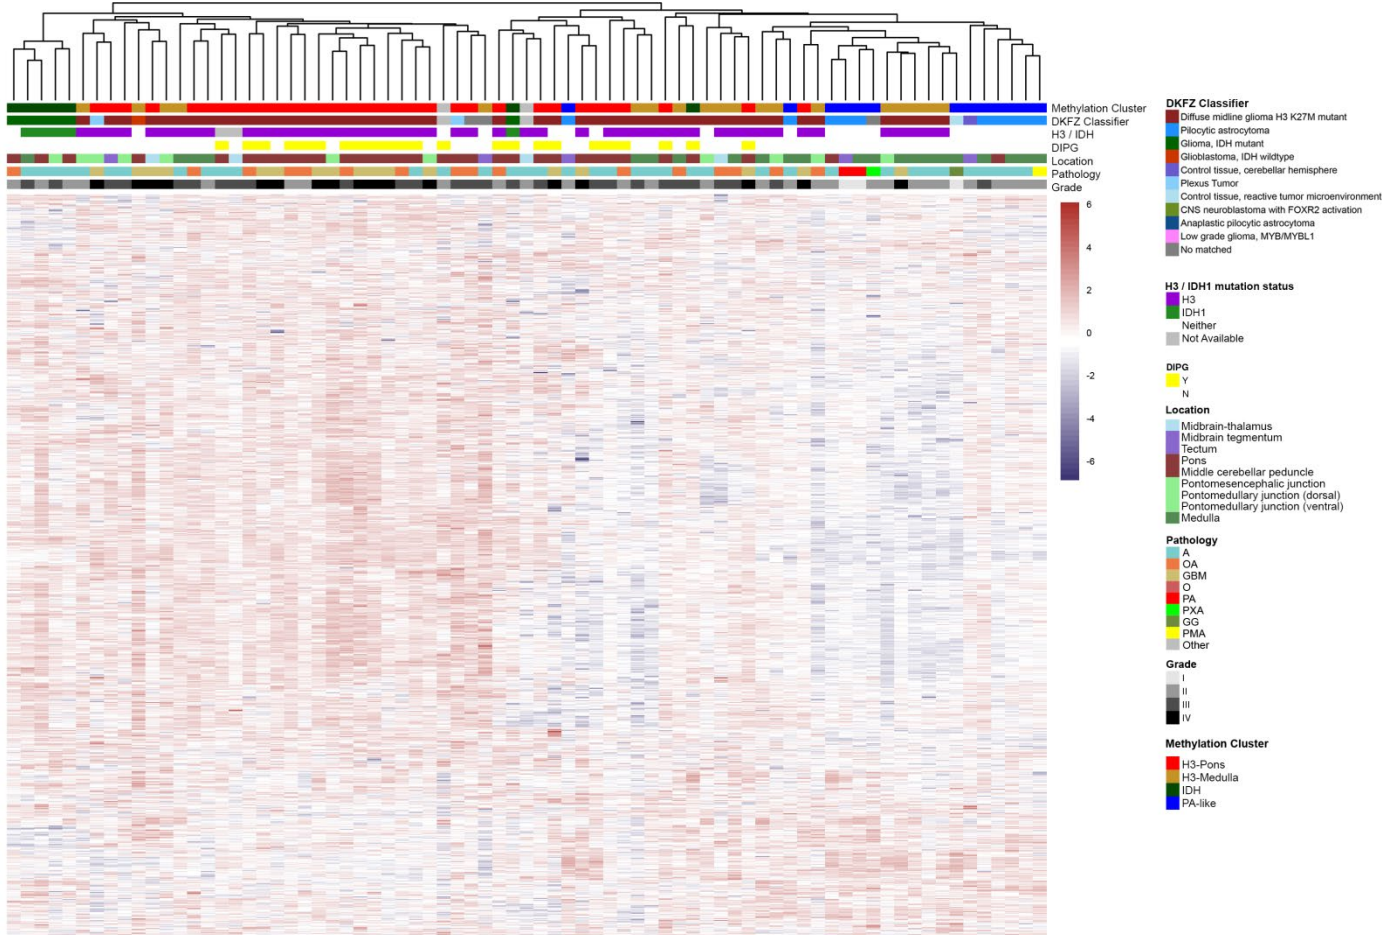

**Supplementary Figure 6 Hierarchical clustering of normalized FPKM from RNaseq Genes are selected from lists of transcription factors.**

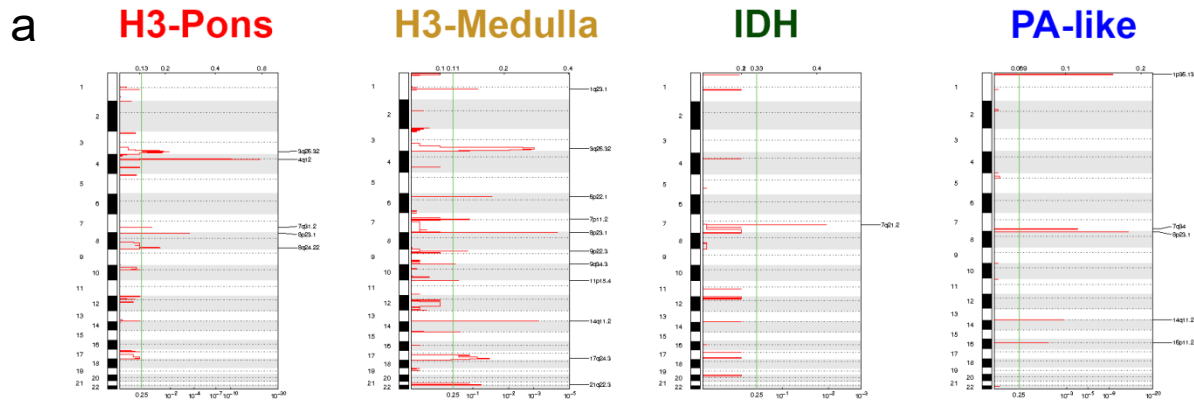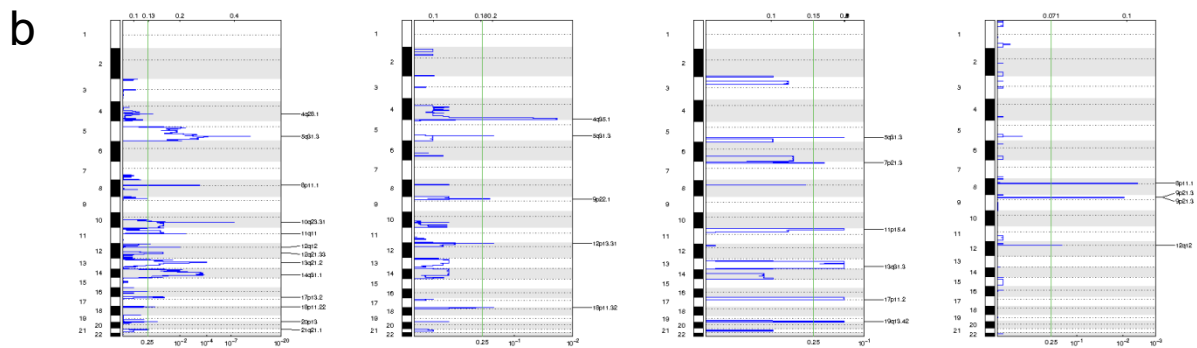

**Supplementary Figure 7 Copy number alterations in four methylation clusters (a) Copy number gain (b) Copy number loss**

a

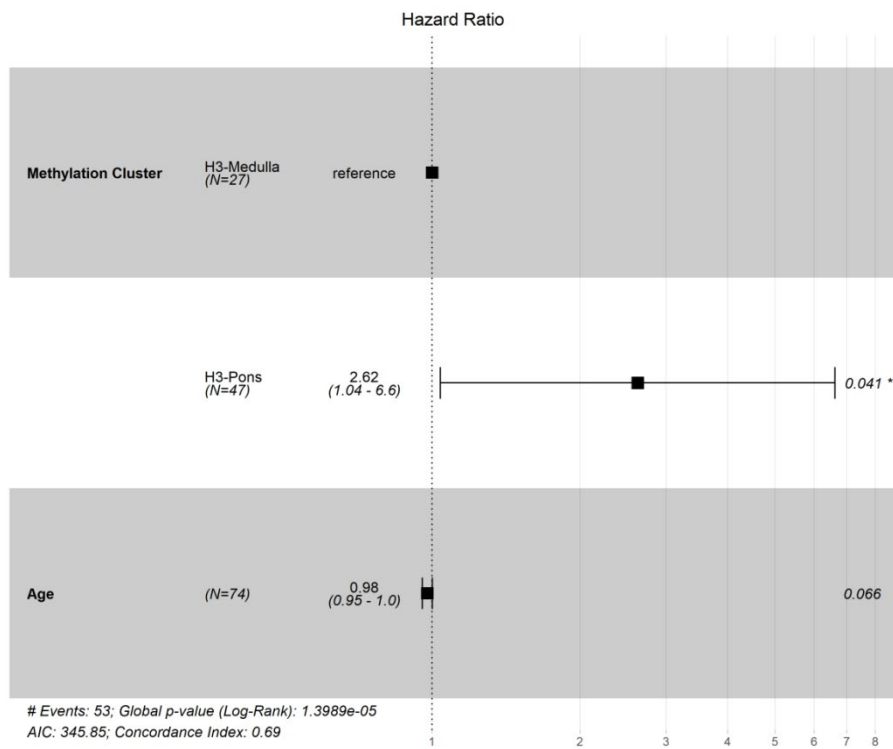

b

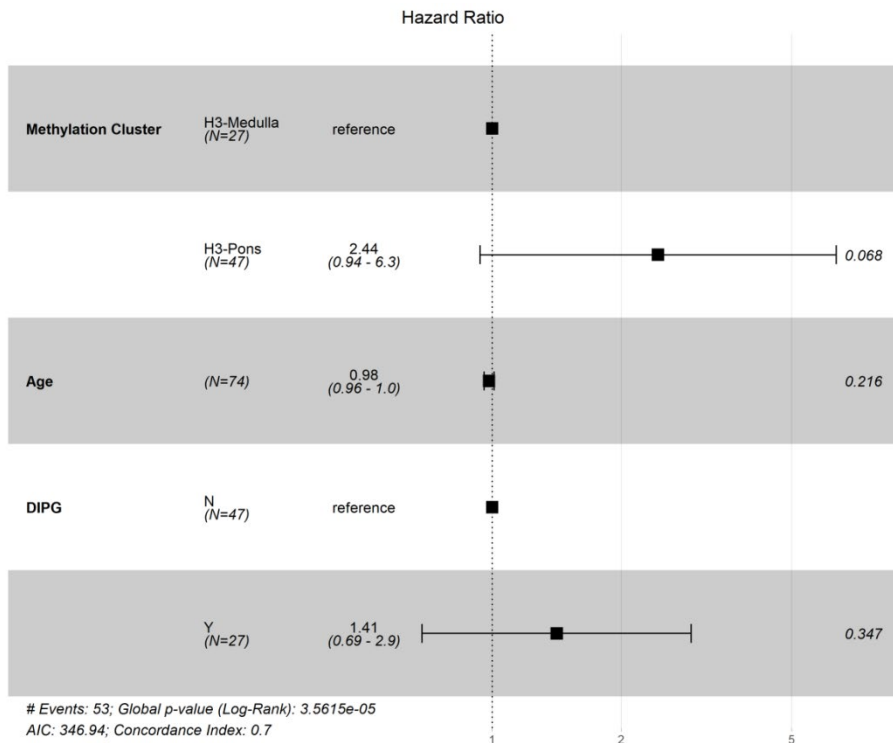

**Supplementary Figure 8 Results of Cox proportional hazards regression model for multivariate survival analysis.** (a) Result of regression model using the status of Methylation Cluster and Age (b) Result of regression model Including age, the diagnosis of DIPG, and status of Methylation Cluster



**Supplementary Table 1** Summary table of samples, grouped by clusters defined by methylation patterns.

|                                      | <b>H3-Pons<br/>(n=47)</b> | <b>H3-Medulla<br/>(n=27)</b> | <b>IDH (n=15)</b>     | <b>PA-like (n=34)</b> | <b>Unknown (n=3)</b> |
|--------------------------------------|---------------------------|------------------------------|-----------------------|-----------------------|----------------------|
| <b>Location</b>                      |                           |                              |                       |                       |                      |
| Midbrain-thalamus                    | 3 (6.4%)                  | 1 (3.7%)                     |                       |                       | 1 (33.3%)            |
| Midbrain tegmentum                   | 1 (2.1%)                  | 1 (3.7%)                     | 1 (6.7%)              | 8 (23.5%)             |                      |
| Tectum                               | 1 (2.1%)                  |                              |                       | 4 (11.8%)             |                      |
| Pontomesencephalic junction          | 2 (4.3%)                  |                              |                       |                       |                      |
| Pons                                 | 29 (61.7%)                | 1 (3.7%)                     | 3 (20.0%)             | 3 (8.8%)              | 2 (66.7%)            |
| Pontomedullary junction<br>(dorsal)  | 1 (2.1%)                  | 6 (22.2%)                    | 1 (6.7%)              |                       |                      |
| Pontomedullary junction<br>(ventral) | 3 (6.4%)                  | 1 (3.7%)                     | 3 (20.0%)             | 1 (2.9%)              |                      |
| Medulla                              | 3 (6.4%)                  | 17 (63.0%)                   | 4 (26.7%)             | 18 (52.9%)            |                      |
| Middle cerebellar peduncle           | 4 (8.5%)                  |                              | 3 (20.0%)             |                       |                      |
| <b>Age</b>                           |                           |                              |                       |                       |                      |
| Median(LQ-UQ)                        | 11 (7.0 - 24.5)           | 41 (26.0- 48.5)              | 39 (33.0-44.0)        | 14 (8.0-34.5)         | 8 (5.5-34.5)         |
| <b>Survival (Months)</b>             |                           |                              |                       |                       |                      |
| Median (CI)                          | 9.47<br>(8.53 - 13.2)     | 26.33<br>(16.13 - Inf)       | 141.2<br>(24.17 - NA) | NA                    | 8 (3.0 - Inf)        |
| <b>Grade</b>                         |                           |                              |                       |                       |                      |
| I                                    |                           |                              | 1 (6.7%)              | 10 (29.4%)            |                      |
| II                                   | 8 (17.0%)                 | 11 (40.7%)                   | 10 (66.7%)            | 21 (61.8%)            | 2 (66.7%)            |
| III                                  | 19 (40.4%)                | 12 (44.4%)                   | 4 (26.7%)             | 3 (8.8%)              | 1 (33.3%)            |
| IV                                   | 20 (42.6%)                | 4 (14.8%)                    |                       |                       |                      |
| <b>Histology</b>                     |                           |                              |                       |                       |                      |
| A                                    | 14 (29.8%)                | 16 (59.3%)                   | 9 (60.0%)             | 17 (50.0%)            | 3 (100.0%)           |
| GBM                                  | 20 (42.6%)                | 4 (14.8%)                    |                       |                       |                      |
| GG                                   |                           |                              |                       | 3 (8.8%)              |                      |
| O                                    |                           | 1 (3.7%)                     |                       |                       |                      |
| OA                                   | 12 (25.5%)                | 6 (22.2%)                    | 5 (33.3%)             | 4 (11.8%)             |                      |
| PA                                   |                           |                              | 1 (6.7%)              | 7 (20.6%)             |                      |
| PMA                                  | 1 (2.1%)                  |                              |                       | 1 (2.9%)              |                      |
| PXA                                  |                           |                              |                       | 1 (2.9%)              |                      |
| other                                |                           |                              |                       | 1 (2.9%)              |                      |
| <b>Gender</b>                        |                           |                              |                       |                       |                      |
| Female                               | 25 (53.2%)                | 9 (33.3%)                    | 7 (46.7%)             | 16 (47.1%)            | 2 (66.7%)            |
| Male                                 | 22 (46.8%)                | 18 (66.7%)                   | 8 (53.3%)             | 18 (52.9%)            | 1 (33.3%)            |
| <b>DIPG</b>                          |                           |                              |                       |                       |                      |
| Y                                    | 27 (57.4%)                |                              | 5 (33.3%)             |                       | 2 (66.7%)            |
| N                                    | 20 (42.6%)                | 27 (100.0%)                  | 10 (66.7%)            | 34 (100.0%)           | 1 (33.3%)            |

**Supplementary Table 2** Primer information for validating fusion genes

|                           |        |                            |     |                                                                                  |
|---------------------------|--------|----------------------------|-----|----------------------------------------------------------------------------------|
| No1: Amplicon Size = 107  |        |                            |     | CAPZA2->MET                                                                      |
|                           | SEQ_L2 | TGGAAGCATTCTGCTAAACTCTTTG  | 35  | 58.21                                                                            |
|                           | SEQ_R2 | gcggtttgtcgccagaagga       | 141 | 60.41                                                                            |
| No2: Amplicon Size = 104  |        |                            |     | CAPZA2->MET                                                                      |
|                           | SEQ_L3 | TGGAAGCATTCTGCTAAACTCTTTG  | 35  | 58.21                                                                            |
|                           | SEQ_R3 | ttgcagatgttcggttactgct     | 138 | 57.29                                                                            |
| No3: Amplicon Size = 120  |        |                            |     | CAPZA2->MET                                                                      |
|                           | SEQ_L2 | CAGGAGCACGAGGATGCCAG       | 22  | 59.99                                                                            |
|                           | SEQ_R2 | gcggtttgtcgccagaagga       | 141 | 60.41                                                                            |
| No4: Amplicon Size = 117  |        |                            |     | CAPZA2->MET                                                                      |
|                           | SEQ_L2 | CAGGAGCACGAGGATGCCAG       | 22  | 59.99                                                                            |
|                           | SEQ_R2 | ttgcagatgttcggttactgct     | 138 | 57.29                                                                            |
| No5: Amplicon Size = 104  |        |                            |     | CAPZA2->MET                                                                      |
|                           | SEQ_L2 | ATTCATCACGGCGCGCTTCA       | 35  | 60.55                                                                            |
|                           | SEQ_R2 | ttgcagatgttcggttactgct     | 138 | 57.29                                                                            |
| No6: Amplicon Size = 110  |        |                            |     | KMT2E->MET                                                                       |
|                           | SEQ_L1 | GGGGTTGATACAGCAGAGACG      | 30  | 59.43                                                                            |
|                           | SEQ_R1 | caggagcacgaggatgccag       | 139 | 59.99                                                                            |
| No7: Amplicon Size = 114  |        |                            |     | MET->CTTNBP2                                                                     |
|                           | SEQ_L3 | CGCCGCTGACTTCTCCACTG       | 43  | 60.54                                                                            |
|                           | SEQ_R3 | tctggagtgccaggaacggg       | 156 | 60.99                                                                            |
| No8: Amplicon Size = 112  |        |                            |     | ST7,ST7,ST7,ST7,ST7,ST7,ST7,ST7,ST7->CAPZA2                                      |
|                           | SEQ_L2 | TGGTATTCATTTCTGCAGCTTCTACA | 19  | 57.36                                                                            |
|                           | SEQ_R2 | ggtctacatcctcggggtgc       | 130 | 59.99                                                                            |
| No9: Amplicon Size = 109  |        |                            |     | CAPZA2->CLCN1                                                                    |
|                           | SEQ_L1 | TCGCCAGAAGGAAGATGGCG       | 29  | 59.64                                                                            |
|                           | SEQ_R1 | accatcaggaagagcatggc       | 137 | 57.54                                                                            |
| No10: Amplicon Size = 131 |        |                            |     | CAPZA2->THAP5                                                                    |
|                           | SEQ_L3 | GGGAACCCATGAATCTCGCTT      | 11  | 57.27                                                                            |
|                           | SEQ_R3 | gcggtttgtcgccagaagga       | 141 | 60.41                                                                            |
| No11: Amplicon Size = 100 |        |                            |     | CAPZA2->PNPLA8                                                                   |
|                           | SEQ_L1 | TGCTTGCTTCTCTGCTTCCCA      | 42  | 59.11                                                                            |
|                           | SEQ_R1 | gcggtttgtcgccagaagga       | 141 | 60.41                                                                            |
| No12: Amplicon Size = 130 |        |                            |     | CTTNBP2->MET                                                                     |
|                           | SEQ_L4 | CACGAGGATGCCAGGTGCAA       | 28  | 60.13                                                                            |
|                           | SEQ_R4 | ggtgaacaccagtcctcgca       | 157 | 59.43                                                                            |
| No13: Amplicon Size = 102 |        |                            |     | RP11-2B6.3->MET                                                                  |
|                           | SEQ_L1 | CCCCATTGCTCCTCTGCACC       | 14  | 60.2                                                                             |
|                           | SEQ_R1 | ctccgagcgcgagATAAA         | 115 | 60.13                                                                            |
| No14: Amplicon Size = 115 |        |                            |     | SYS1-DBNDD2,DBNDD2,DBNDD2,DBNDD2,DBNDD2,DBNDD2,DBNDD2,DBNDD2,DBNDD2,DBNDD2->SYS1 |
|                           | SEQ_L1 | ACTGCTTTCCTCGCCGGATG       | 40  | 59.92                                                                            |
|                           | SEQ_R1 | ccacatgagaccacaggccc       | 154 | 59.85                                                                            |
| No15: Amplicon Size = 105 |        |                            |     | C15orf57->CBX3                                                                   |
|                           | SEQ_L1 | CGCCTACAGCTCAAGCCACA       | 54  | 59.85                                                                            |
|                           | SEQ_R1 | ttgtgagaatgggagcatattgaca  | 158 | 57.24                                                                            |
